# Supplementary material for: Direct medical charges of pediatric traumatic brain injury in multiple clinical settings
Source: PubMed Central journal article supplement (PMC5005782; doi:10.1186/2197-1714-1-13), 2014-05-06
Supplement: 40621_2013_13_MOESM1_ESM.pdf [file 40621_2013_13_MOESM1_ESM.pdf]

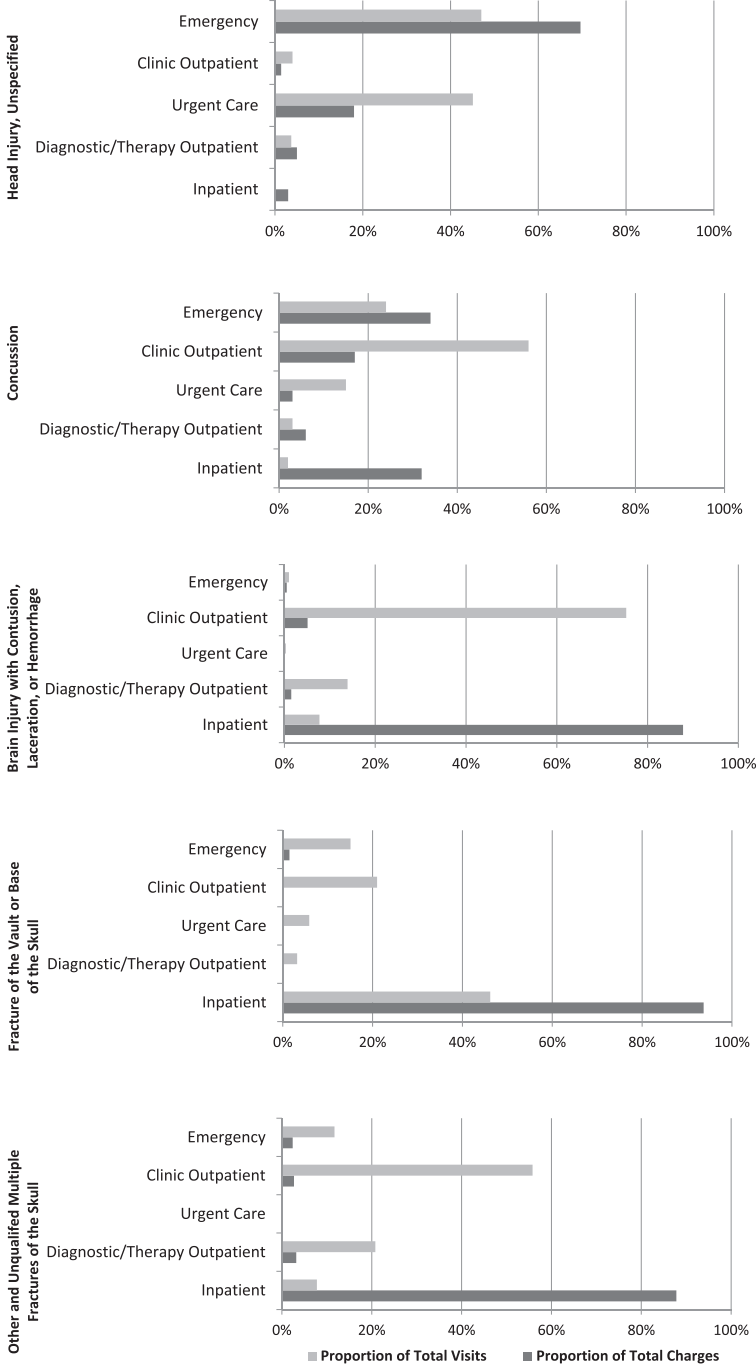

\*Because observation and organ procurement visits accounted for a small proportion of total visits and charges, they were excluded from this figure.
